# Supplementary material
Source: PubMed Central journal article supplement (PMC10083193)
Supplement: NIHMS1832588-supplement-Graphics.pdf [file NIHMS1832588-supplement-Graphics.pdf]

## Supplementary Information

### SI Text 1. Analysis including participants aged “3 or younger” and “17 or older”

In the main text, we excluded participants who reported their age in the ambiguous response categories of “3 or under” or “17 or older”, as these spanned wider ranges of possible ages than the other, one-year response categories, complicating their interpretation. As this exclusion decision was not preregistered, for transparency we repeated the main analyses without excluding these two groups, so as to ensure that the post-hoc exclusion decision did not affect our conclusions.

It did not: accurate discrimination was robustly replicated within both “3 or under” (lullaby  $d' = 1.16$ , 95%  $CI [1.00\ 1.32]$ ; dance  $d' = 1.21$ , 95%  $CI [1.09\ 1.32]$ ; healing  $d' = 0.56$ , 95%  $CI [0.44\ 0.67]$ ) and “17 or older” (lullaby  $d' = 1.36$ , 95%  $CI [1.29\ 1.42]$ ; dance  $d' = 1.30$ , 95%  $CI [1.25\ 1.35]$ ; healing  $d' = 0.48$ , 95%  $CI [0.43\ 0.53]$ ). These findings raise the possibility that the ability to discriminate form and function in music may well extend to children younger than four years of age.

Other key findings reported in the main text, such as those concerning age effects, did not change substantively when including these two groups. For brevity, we did not repeat them here, but readers interested in exploring this question are welcome to use our open data and code to do so.

### SI Text 2. Variation across countries, languages, and songs

Because the instructions of the experiment were only presented in English, there could be differences in performance between children whose native language is English and children whose native language is not English.

We tested this question in two ways. First, we replicated the main  $d'$  analyses using only data from English-speaking participants. The findings robustly replicated, with slightly lower scores (dance  $d' = 1.03$ ; lullaby  $d' = 0.96$ ; healing  $d' = 0.23$ ;  $ps < 0.05$ ). The effect of age was not statistically significant for any of the song types ( $ps > 0.05$ ).

Second, as a more general test of this issue, we measured the degree of variability across the 127 countries of origin and the 128 languages using coefficient of variation scores derived from a mixed-effects model predicting accuracy. In each case we found very little variation (0.045 and 0.034, respectively). To put these scores in context, the coefficient of variation for the 88 songs used in the experiment was 0.463 (i.e., ~10/20 times larger).

Together, this suggests that the heterogeneity of our participants, and the varying degrees to which the children may have comprehended English, likely had a negligible influence on our results.

# Supplementary Figures

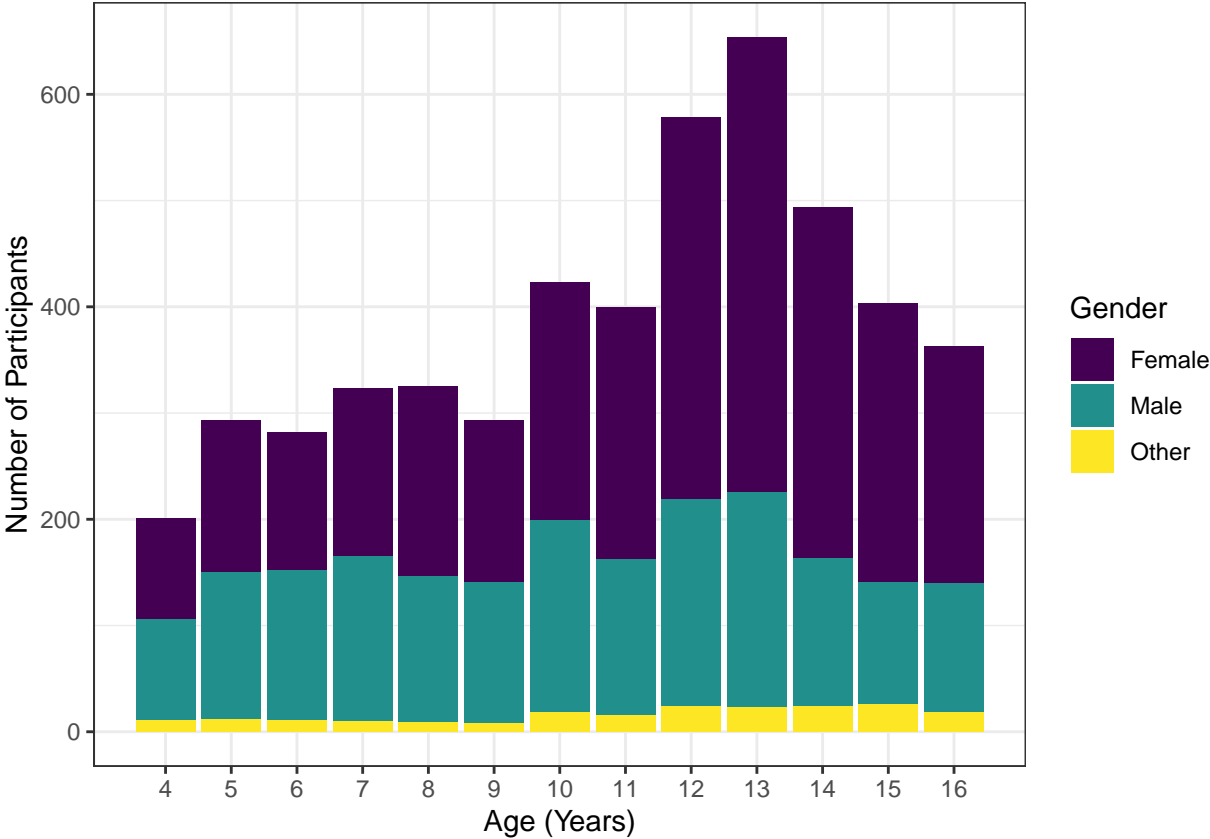

SI Figure 1. The distributions of ages and genders of the participants.

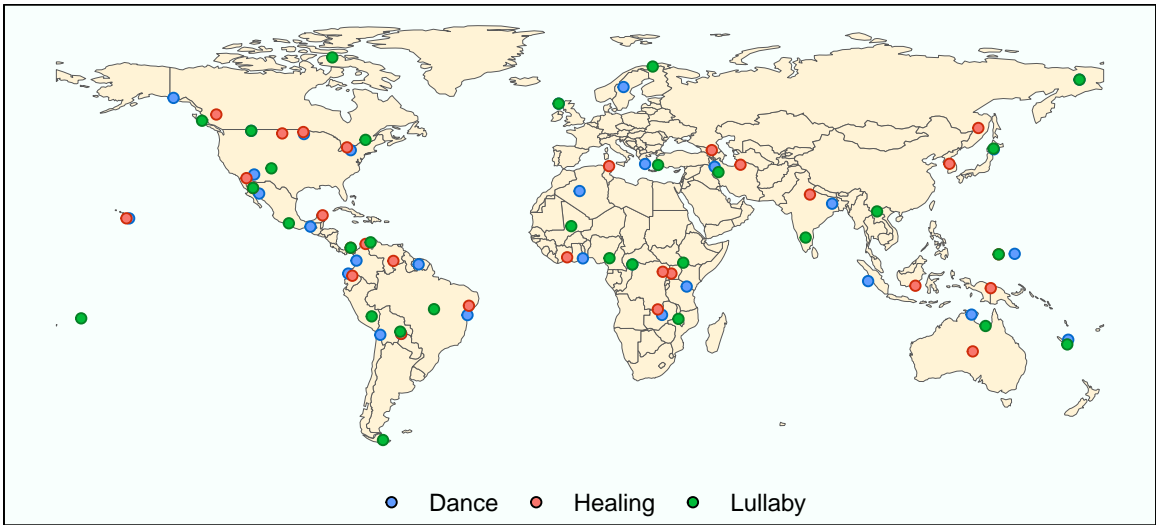

**SI Figure 2.** The approximate locations of societies in which the *Natural History of Song Discography* recordings used in the experiment were originally recorded.

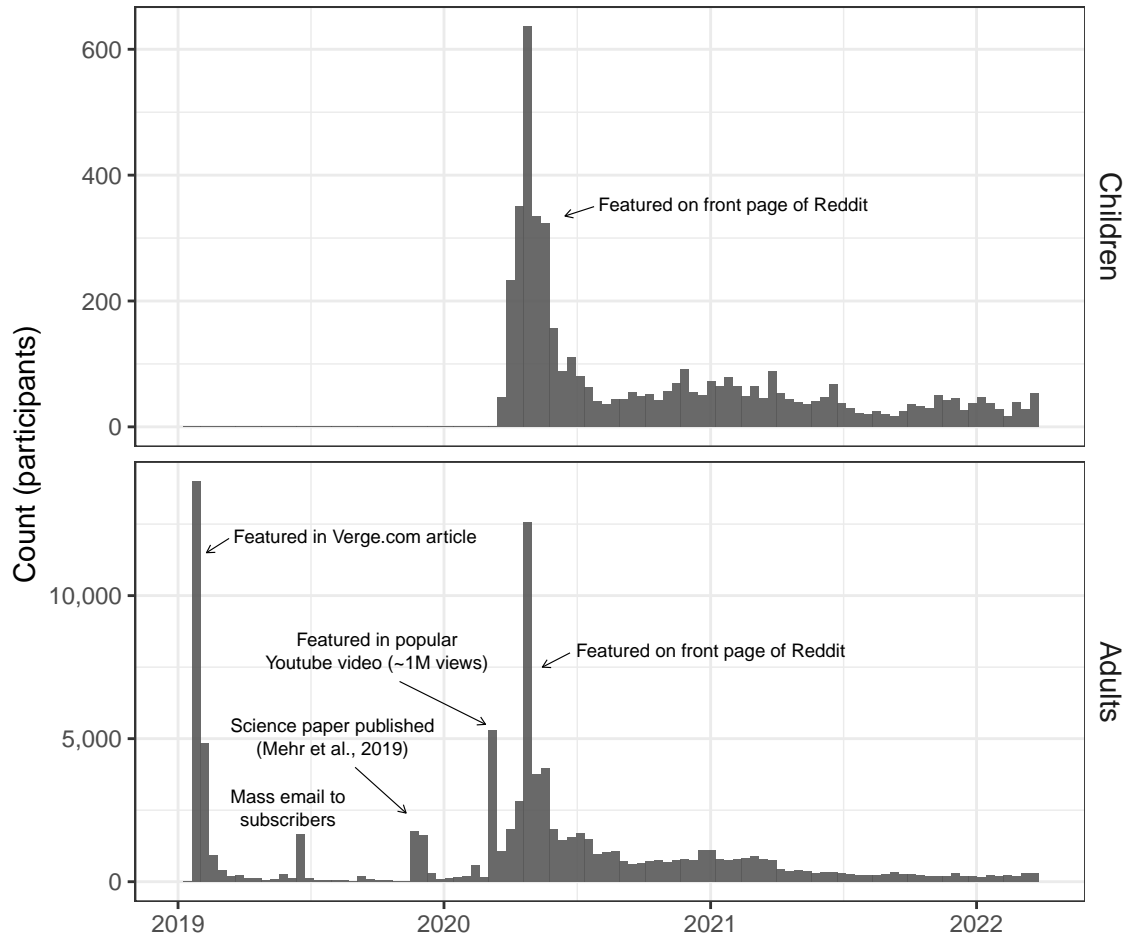

**SI Figure 3.** The time-series of recruitment in children and adults. The histograms show the number of participants (after exclusion) that completed the experiments (the child version, top; or adult version, bottom) between 2019 and 2022. The date of participation is indicated on the  $x$ -axis. The annotations on each plot indicate specific events that coincided with spikes in participation, such as viral posts on social media, news coverage, etc. Other than these explicable spikes in participation, we see evidence of steady recruitment commensurate with all of our prior and current online experiments, suggesting that the participants were genuine, and not malicious entities (i.e., bots).

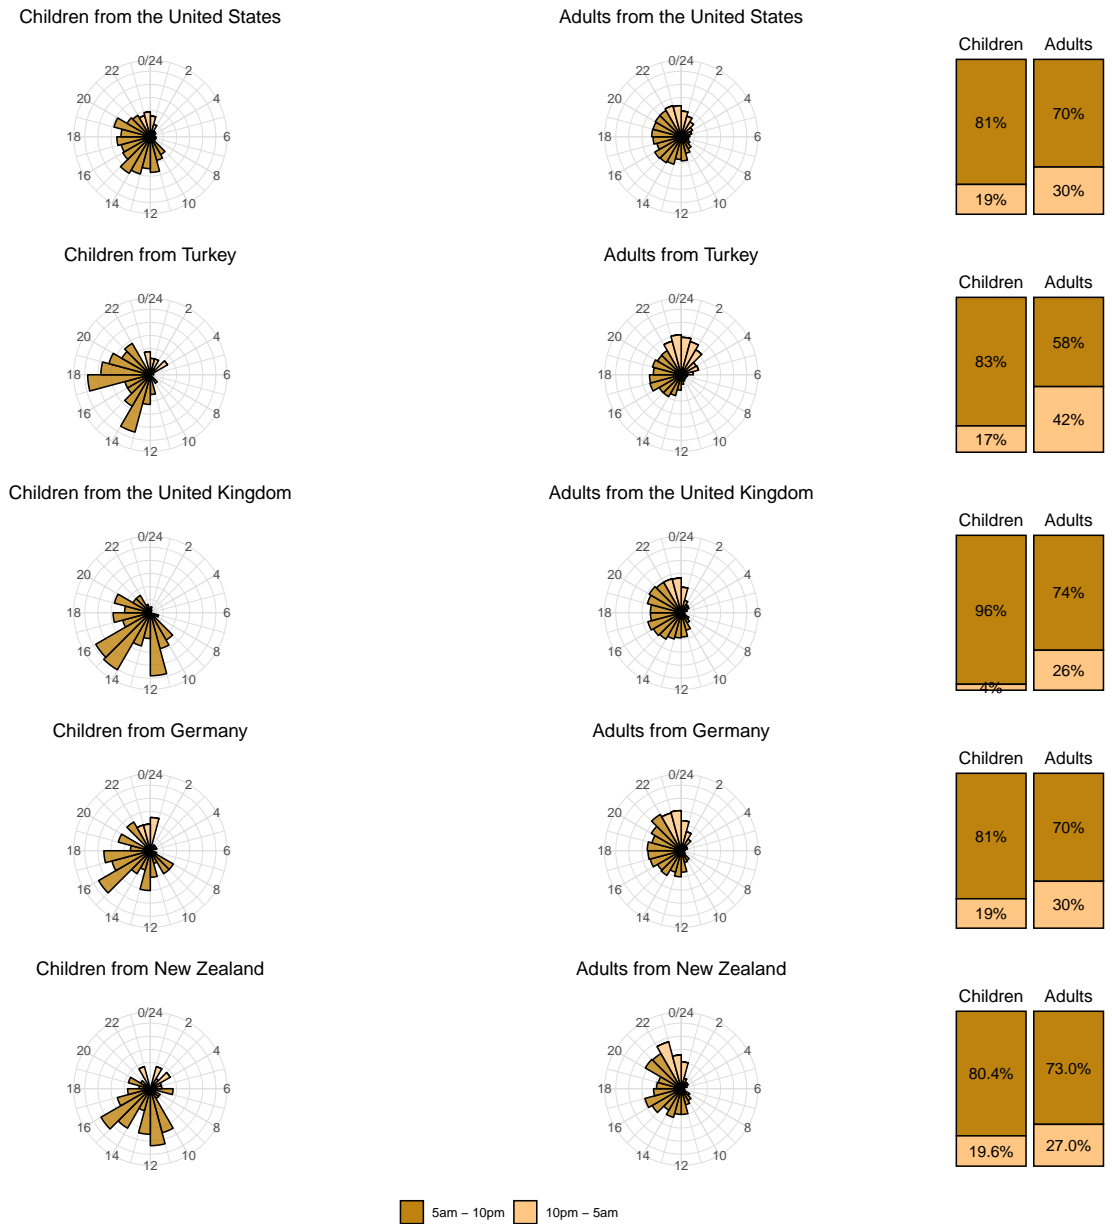

**SI Figure 4.** The timing of participation differs across children and adults across five high-recruitment countries. The polar histograms show the relative proportion of the cohort that participated at a particular time of day (on a 24-hour clock); the two shades differentiate an arbitrary threshold of ‘day’ versus ‘late night/early morning’ participation (see legend). The bar plots show the proportions between these two cutoffs in the data. The distributions of participation times differ markedly across the cohorts, with general consistency across countries within each cohort. This suggests that the participants who self-report being children are, in fact, children, as they are less likely to participate late at night. Note that four of the plotted countries have a single time zone; the United States data is aggregated across three time zones, but is included here as that country had the largest samples of children and adults.

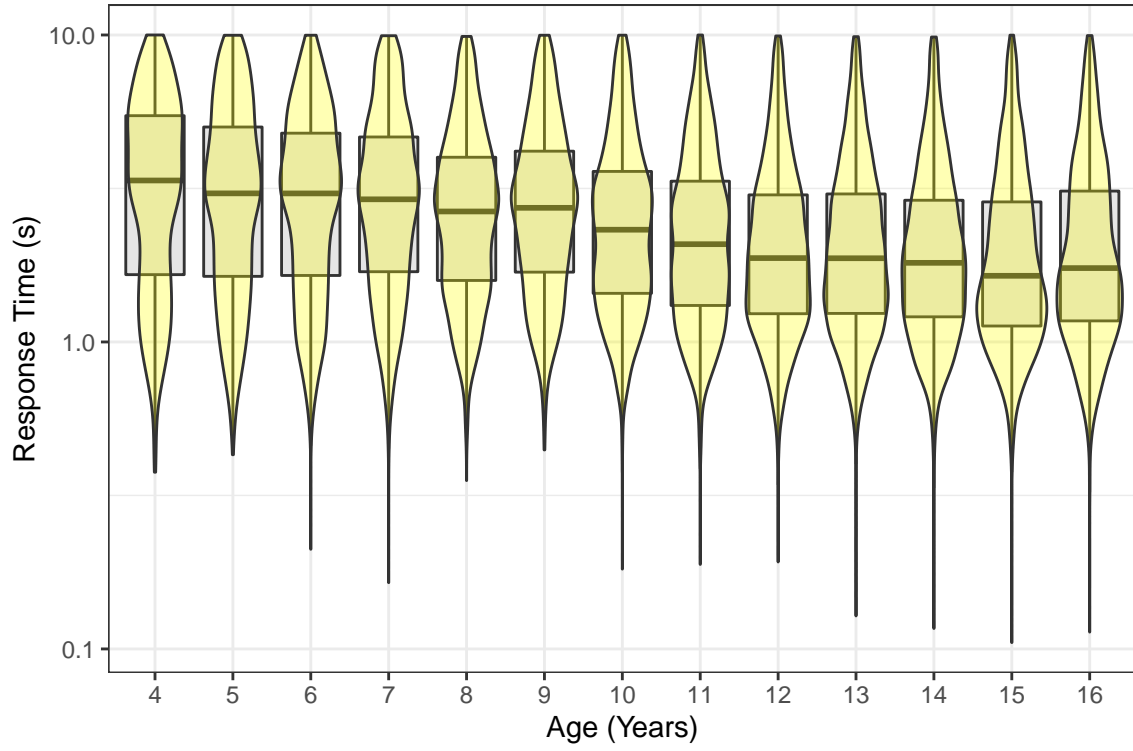

**SI Figure 5.** Children’s response times, aggregated across all trials, as a function of age. Response times were comparable across song types. Note that the  $y$ -axis is on a log scale.

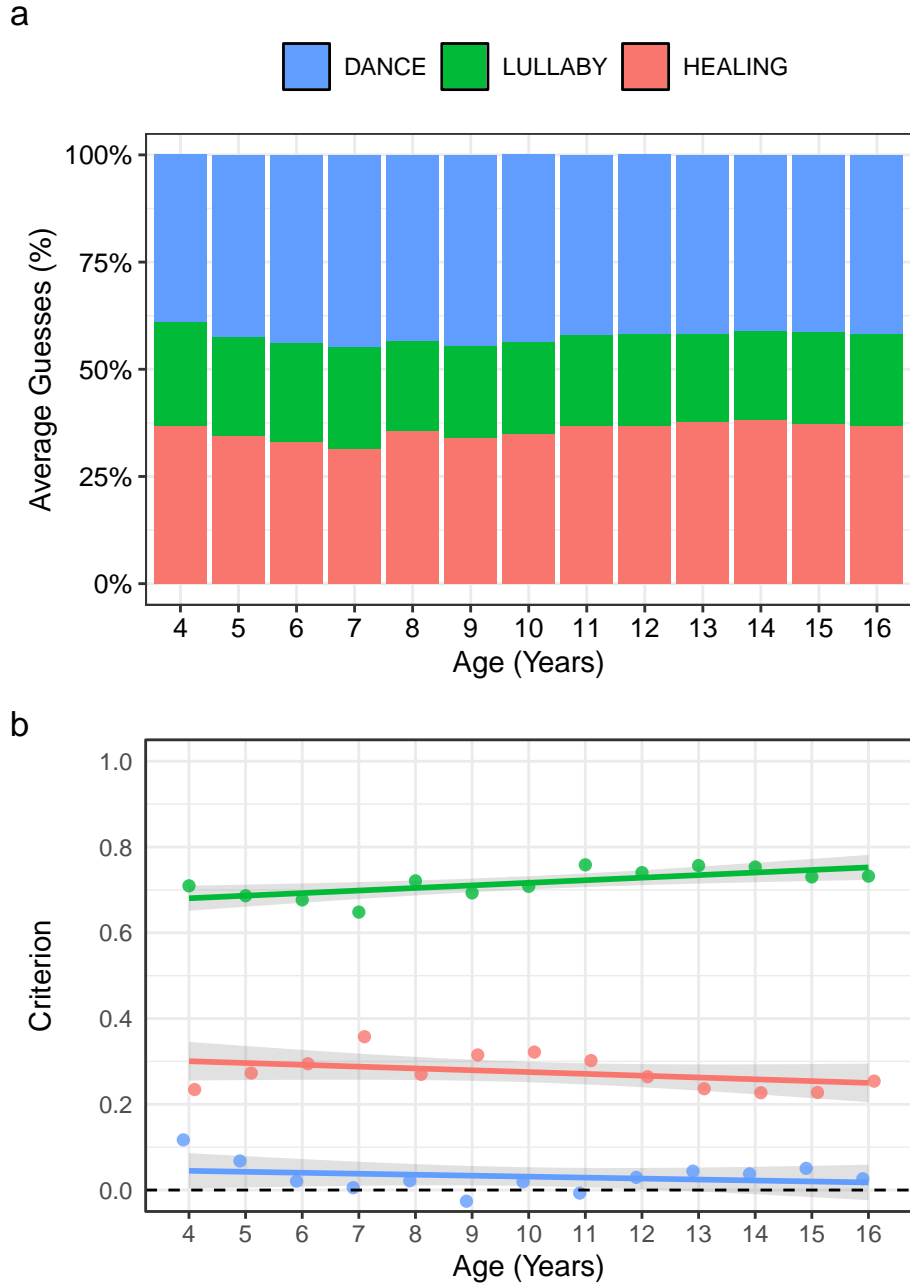

**SI Figure 6.** Response biases and criterion scores for the children were stable across ages. **(a)** The stacked-bar graphs represent the proportion of responses for each of the three song categories over age. The colors of the bars represent the response types; evidently, they were not evenly used. **(b)** We estimated criterion values for each age group, where higher criterion denotes more conservative guessing and lower criterion values denote more liberal guessing. The circles represent the criterion estimates; the lines depict a linear regression for each song type; and the shaded regions represent the 95% confidence intervals from each regression. None of the regressions were statistically significant ( $p > 0.05$ ). Participants required the strongest evidence to make a lullaby guess and required the least evidence to make a dance guess.

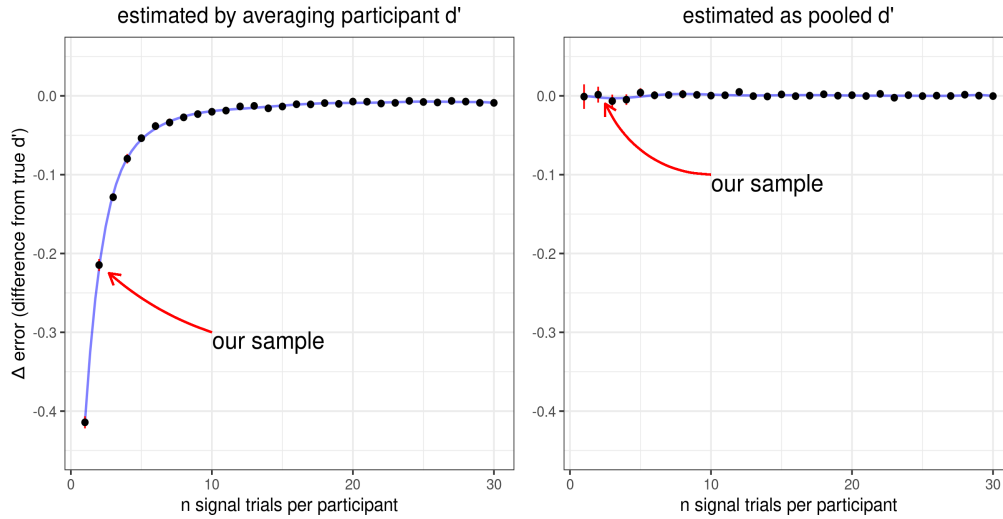

**SI Figure 7.** A simulation shows that the pooled d-prime provides a less biased estimate of sensitivity than does an average of participant-level d-prime estimates. The typical approach for calculating cohort-level sensitivity is to first calculate d-prime scores for each participant, and then take their average. However, our experiment had a small number of trials per participant (in part because young children have short attention spans); this meant that there were limited numbers of signal and noise trials for each participant, rendering the participant-level estimates difficult to interpret. In cases like these, Macmillan & Kaplan (1985) advocate for a collapsed/pooled d-prime approach. To test whether our particularly large sample size (~5000 children) would compensate for the deficiencies of sparse within-subject sampling, we ran a simulation to test whether averaged d-prime or pooled d-prime would be optimal. The simulation used the same number of participants in our study and simulated the ability of each approach to estimate a true effect size over a range of within-subject trial counts. The two plots show the estimated size of error in each method (on the  $y$ -axes), at differing numbers of signal trials per participant (on the  $x$ -axes). The results show that the averaging d-prime approach underestimates the true effect by ~20%, and the pooled approach is unbiased. We therefore opted to use the pooled d-prime approach in the main analyses.



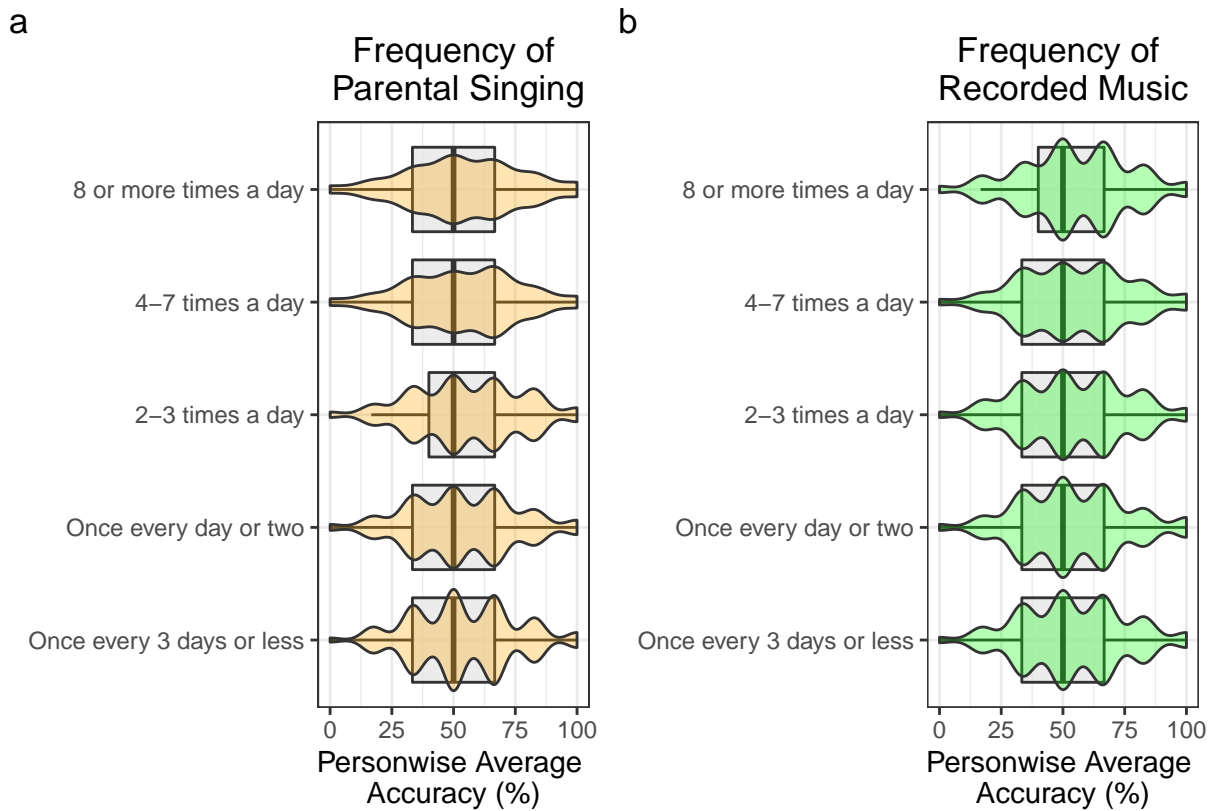

**SI Figure 8.** Children’s accuracy of classifying songs was not related to their in-home musical experiences: across different levels of (a) the frequency of parental singing and (b) the frequency of recorded music listening, person-wise accuracy did not change. The thick lines represent medians; the boxes represent interquartile ranges; the lines represent ranges; and the shaded areas depict kernel density estimates.

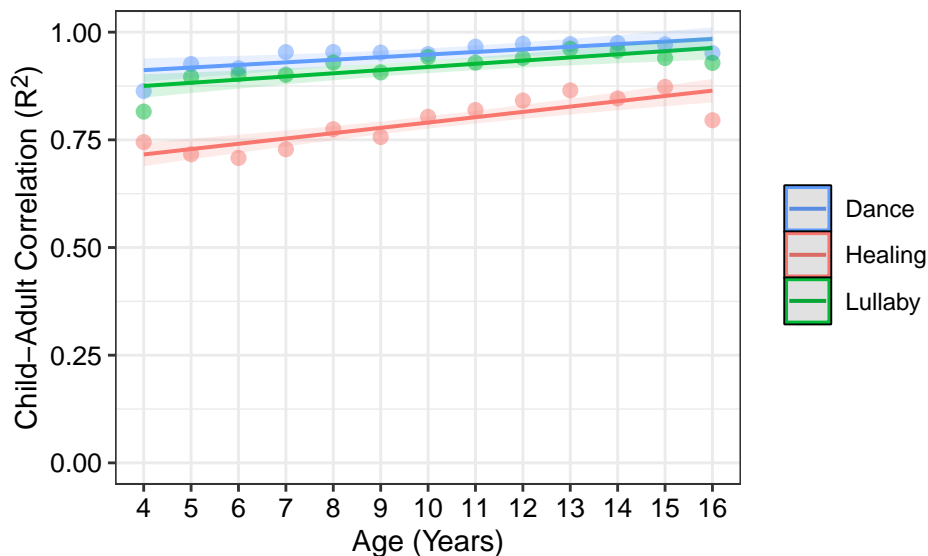

**SI Figure 9.** The similarity between children’s and adult’s inferences is high and modestly increases through childhood. We measured the similarity between children’s and adult’s inferences as the proportion of variance explained ( $R^2$ ) by regressing the average song-wise inferences of children on the adults, for each of the 13 yearlong age bins. We then constructed a regression model that predicted these  $R^2$  values from the interaction between the guessed category for each song and age of the children, producing the regression lines shown in the figure for each response type (dance, lullaby, or healing song). The shaded areas representing 95% confidence interval and the points representing the raw values. The main effect of age was statistically significant ( $p < 0.001$ ) but the interaction of age with song-type was not ( $p = 0.09$ ).

## Supplementary Tables

| Children                             |          | Adults              |          |
|--------------------------------------|----------|---------------------|----------|
| Language                             | <i>n</i> | Language            | <i>n</i> |
| English                              | 2,941    | English             | 52,630   |
| Turkish                              | 316      | Spanish             | 11,324   |
| Spanish                              | 294      | Turkish             | 5,099    |
| Chinese/Mandarin                     | 131      | German              | 4,350    |
| German                               | 128      | French              | 3,122    |
| Chinese/Cantonese/Yue                | 66       | Polish              | 3,048    |
| French                               | 63       | Portuguese          | 2,917    |
| Italian                              | 61       | Dutch               | 2,754    |
| Polish                               | 52       | Danish              | 2,590    |
| Russian                              | 52       | Russian             | 2,288    |
| Indonesian                           | 48       | Swedish             | 2,281    |
| Vietnamese                           | 44       | ChineseMandarin     | 1,750    |
| Portuguese                           | 43       | Italian             | 1,645    |
| Dutch                                | 37       | Indonesian          | 1,093    |
| Arabic                               | 34       | ChineseCantoneseYue | 1,065    |
| Tagalog                              | 30       | Norwegian           | 939      |
| Tamil                                | 30       | Finnish             | 896      |
| Swedish                              | 27       | Greek               | 831      |
| Hebrew                               | 26       | Romanian            | 788      |
| Hindi                                | 25       | Tagalog             | 768      |
| Romanian                             | 25       | Arabic              | 716      |
| Chinese/Taiwanese/Min<br>Nan/Hokkien | 21       | Hindi               | 654      |
| Catalan                              | 18       | Hungarian           | 610      |
| Malayalam                            | 18       | Croatian            | 533      |
| Norwegian                            | 18       | Vietnamese          | 509      |
| Greek                                | 17       | Czech               | 500      |
| Korean                               | 17       | Japanese            | 463      |
| Khmer                                | 16       | Other               | 431      |
| Other                                | 16       | Serbian             | 421      |
| Czech                                | 15       | Hebrew              | 382      |

**SI Table 1** The native languages of participants, reported in the child and adult cohorts. For brevity, only the 30 most-commonly reported languages are displayed here.

| Children           |          | Adults                     |          |
|--------------------|----------|----------------------------|----------|
| Country            | <i>n</i> | Country                    | <i>n</i> |
| United States      | 2,031    | United States              | 32,848   |
| Canada             | 361      | United Kingdom             | 7,119    |
| Turkey             | 313      | Canada                     | 4,956    |
| United Kingdom     | 269      | Turkey                     | 4,661    |
| Australia          | 201      | Australia                  | 4,164    |
| Germany            | 124      | Germany                    | 3,978    |
| Spain              | 83       | Spain                      | 3,042    |
| China              | 80       | Denmark                    | 2,700    |
| Singapore          | 79       | Argentina                  | 2,627    |
| New Zealand        | 73       | Poland                     | 2,607    |
| Argentina          | 65       | Sweden                     | 2,365    |
| Italy              | 63       | France                     | 2,057    |
| Hong Kong          | 60       | Brazil                     | 1,861    |
| Indonesia          | 60       | India                      | 1,735    |
| India              | 56       | Mexico                     | 1,711    |
| Malaysia           | 52       | Italy                      | 1,502    |
| Poland             | 46       | The Netherlands            | 1,499    |
| Philippines        | 44       | Russia                     | 1,415    |
| France             | 43       | Singapore                  | 1,394    |
| Mexico             | 42       | Belgium                    | 1,087    |
| Russian Federation | 40       | Indonesia                  | 1,041    |
| Sweden             | 38       | Norway                     | 1,006    |
| Netherlands        | 35       | Colombia                   | 996      |
| Brazil             | 33       | Philippines                | 970      |
| Taiwan             | 33       | Chile                      | 948      |
| Vietnam            | 32       | Finland                    | 934      |
| Colombia           | 31       | China                      | 883      |
| Austria            | 27       | Kingdom of the Netherlands | 834      |
| Israel             | 26       | Portugal                   | 810      |
| Chile              | 25       | Malaysia                   | 765      |

**SI Table 2** The countries where participants were located, reported in the child and adult cohorts. For brevity, only the 30 most-commonly reported countries are displayed here.

| Song ID | Type    | Society                  | Country (present-day)            | Language                 |
|---------|---------|--------------------------|----------------------------------|--------------------------|
| 1       | Lullaby | Lardil                   | Australia                        | Aranda                   |
| 2       | Healing | Anggor                   | Papua New Guinea                 | Anggor                   |
| 3       | Lullaby | Blackfoot                | USA                              | Blackfoot                |
| 4       | Healing | Uttar Pradesh            | India                            | Andamans                 |
| 5       | Dance   | Emberá                   | Colombia                         | Emberá                   |
| 6       | Healing | Akan                     | Côte d'Ivoire                    | Akan                     |
| 7       | Lullaby | Nahua                    | Mexico                           | Maya (Yucatan Peninsula) |
| 8       | Healing | Yapese                   | Federated States of Micronesia   | Chuuk                    |
| 9       | Dance   | Yolngu                   | Australia                        | Aranda                   |
| 10      | Dance   | Aymara                   | Chile                            | Aymara                   |
| 11      | Dance   | Blackfoot                | USA                              | Blackfoot                |
| 12      | Lullaby | Saami                    | Norway                           | Saami                    |
| 13      | Dance   | Bahia Brazilians         | Brazil                           | Bahia Brazilians         |
| 14      | Healing | Seri                     | Mexico                           | Huichol                  |
| 15      | Healing | Ye'kuana                 | Venezuela                        | Javaé                    |
| 16      | Dance   | Aka                      | Central African Republic         | Aka                      |
| 17      | Healing | Lunda                    | Democratic Republic of the Congo | Bemba                    |
| 18      | Dance   | Greeks                   | Greece                           | Georgia                  |
| 19      | Dance   | Sweden                   | Sweden                           | Saami                    |
| 20      | Healing | Iroquois                 | Canada                           | Iroquois                 |
| 21      | Dance   | Iroquois                 | New York                         | Iroquois                 |
| 22      | Healing | Maya (Yucatan Peninsula) | Mexico                           | Maya (Yucatan Peninsula) |
| 23      | Lullaby | Goajiro                  | Venezuela                        | Chachi                   |
| 24      | Dance   | Gourara                  | Algeria                          | Gourara                  |
| 25      | Dance   | Ojibwa                   | USA                              | Copper Inuit             |
| 26      | Lullaby | Javaé                    | Brazil                           | Javaé                    |
| 27      | Healing | Bahia Brazilians         | Brazil                           | Bahia Brazilians         |
| 28      | Lullaby | Chewa                    | Malawi                           | Bemba                    |
| 29      | Lullaby | Aka                      | Central African Republic         | Aka                      |
| 30      | Healing | Georgia                  | East Georgia                     | Georgia                  |
| 31      | Dance   | Ainu                     | Japan                            | Ainu                     |
| 32      | Lullaby | Highland Scots           | United Kingdom                   | Highland Scots           |
| 33      | Lullaby | Seri                     | Mexico                           | Huichol                  |
| 34      | Dance   | Garo                     | India                            | Andamans                 |
| 35      | Lullaby | Kurds                    | Iran                             | Kurds                    |
| 36      | Lullaby | Fut                      | Cameroon                         | Akan                     |
| 37      | Dance   | Hawaiians                | USA                              | Hawaiians                |
| 38      | Lullaby | Samoans                  | Samoa                            | Hawaiians                |
| 39      | Healing | Kuna                     | Panama                           | Emberá                   |
| 40      | Lullaby | Marathi                  | India                            | Andamans                 |
| 41      | Healing | Pawnee                   | USA                              | Blackfoot                |
| 42      | Lullaby | Guarani                  | Bolivia                          | Bahia Brazilians         |
| 43      | Healing | Meratus                  | Indonesia                        | Central Thai             |
| 44      | Lullaby | Ainu                     | Japan                            | Ainu                     |
| 45      | Dance   | Maasai                   | Tanzania                         | Amhara                   |
| 46      | Healing | Korea                    | South Korea                      | Ainu                     |
| 47      | Healing | Turkmen                  | Iran                             | Kurds                    |
| 48      | Lullaby | Chukchee                 | Russia                           | Chukchee                 |
| 49      | Dance   | Lozi                     | Zambia                           | Bemba                    |
| 50      | Lullaby | Kanaks                   | New Caledonia                    | Anggor                   |
| 51      | Lullaby | Greeks                   | Greece                           | Georgia                  |
| 52      | Dance   | Tlingit                  | USA                              | Haida                    |
| 53      | Lullaby | Tuareg                   | Mali                             | Gourara                  |
| 54      | Healing | Kwakwaka'wakw            | Canada                           | Haida                    |
| 55      | Lullaby | Nyangatom                | Ethiopia                         | Amhara                   |
| 56      | Dance   | Chachi                   | Ecuador                          | Chachi                   |
| 57      | Dance   | Chuuk                    | Federated States of Micronesia   | Chuuk                    |
| 58      | Healing | Quechan                  | USA                              | Hopi                     |
| 59      | Healing | Hawaiians                | USA                              | Hawaiians                |
| 60      | Dance   | Kanaks                   | New Caledonia                    | Anggor                   |
| 61      | Healing | Tunisians                | Tunisia                          | Gourara                  |
| 62      | Dance   | Kurds                    | Iran                             | Kurds                    |
| 63      | Lullaby | Haida                    | Canada                           | Haida                    |
| 64      | Dance   | Mataco                   | Argentina                        | Alacaluf                 |
| 65      | Dance   | Saramaka                 | Suriname                         | Javaé                    |
| 66      | Dance   | Mentawaians              | Indonesia                        | Central Thai             |
| 67      | Dance   | Ewe                      | Ghana                            | Akan                     |
| 68      | Lullaby | Kuna                     | Panama                           | Emberá                   |
| 69      | Lullaby | Ona                      | Argentina                        | Alacaluf                 |

(continued)

| Song ID | Type    | Society         | Country (present-day)               | Language                 |
|---------|---------|-----------------|-------------------------------------|--------------------------|
| 70      | Healing | Ojibwa          | USA                                 | Copper Inuit             |
| 71      | Dance   | Tzeltal         | Mexico                              | Maya (Yucatan Peninsula) |
| 72      | Lullaby | Iglulik Inuit   | Canada                              | Copper Inuit             |
| 73      | Lullaby | Q'ero Quichua   | Peru                                | Aymara                   |
| 74      | Lullaby | Iroquois        | Canada                              | Iroquois                 |
| 75      | Healing | Nanai           | Russia                              | Chukchee                 |
| 76      | Dance   | Highland Scots  | United Kingdom                      | Highland Scots           |
| 77      | Dance   | Chukchee        | Russia                              | Chukchee                 |
| 78      | Healing | Mataco          | Argentina                           | Alacaluf                 |
| 79      | Healing | Walbiri         | Central and North-Central Australia | Aranda                   |
| 80      | Healing | Kogi            | Colombia                            | Chachi                   |
| 81      | Dance   | Hopi            | USA                                 | Hopi                     |
| 82      | Lullaby | Hopi            | USA                                 | Hopi                     |
| 83      | Healing | Otavalo Quichua | Ecuador                             | Aymara                   |
| 84      | Healing | Ganda           | Uganda                              | Amhara                   |
| 85      | Lullaby | Yapese          | Federated States of Micronesia      | Chuuk                    |
| 86      | Dance   | Yaqui           | Mexico                              | Huichol                  |
| 87      | Healing | Mbuti           | Congo                               | Aka                      |
| 88      | Lullaby | Phunoi          | Laos                                | Central Thai             |

**SI Table 3** Summary information about the songs children heard.

| Feature                     | Type              | Selection               | Definition                                                                                                                                                                                                                                                                                                           | Scoring                                                                              |
|-----------------------------|-------------------|-------------------------|----------------------------------------------------------------------------------------------------------------------------------------------------------------------------------------------------------------------------------------------------------------------------------------------------------------------|--------------------------------------------------------------------------------------|
| Accent                      | Expert Annotation | Dance, Lullaby          | The differentiation of musical pulses, usually by volume or emphasis of articulation. A fluid, gentle song will have few accents and a correspondingly low value.                                                                                                                                                    | "none" (0); "a little" (0.5); or "a lot" (1).                                        |
| Tempo                       | Expert Annotation | Dance, Lullaby, Healing | The rate of salient rhythmic pulses (measured by having annotators tap the beat), adjusted to correspond with 'quarter note' equivalent; measured in beats per minute; the perceived speed of the music. A fast song will have a high value.                                                                         | range: 61-205                                                                        |
| Metrical stability          | Expert Annotation | Dance Lullaby, Healing  | The perceived clarity of the metrical rhythmic structure (groupings of perceived strong and weak beats).                                                                                                                                                                                                             | Scale from 1 - 6, ranging from "No macrometer" (1) to "Totally clear macrometer" (6) |
| Melodic simplicity          | Transcription     | Lullaby, Healing        | Variety versus monotony of the melody, measured as the proportion of notes in the transcription corresponding to the most common pitch-class.                                                                                                                                                                        | range: 0.15 - 1                                                                      |
| Vibrato                     | Expert Annotation | Lullaby, Healing        | Presence of vibrato in the singing. Vibrato is a rapid, slight oscillation in pitch that is typically perceived as adding intensity.                                                                                                                                                                                 | "not present" (0); "present" (1)                                                     |
| Syncopation                 | Expert Annotation | Healing                 | The degree of of syncopation in the song (roughly equateable with 'rhythmic complexity'). Syncopation is when rhythmic accents align with metrically weak positions of a metrical beat structure (e.g., having accents half way between when people tap their foot rather than directly aligned with the foot taps). | "none" (0); "a little" (0.5); or "a lot" (1).                                        |
| Maj (-) / min (-) tonality  | Transcription     | Healing, Lullaby        | Tonal quality or mode of the transcription (major or minor) based on the Krumhansl-Schmuckler key-finding algorithm.                                                                                                                                                                                                 | "Major" (0); "Minor" (1)                                                             |
| Ornamentation               | Expert Annotation | Lullaby                 | Melodic embellishment by the singer, usually via rapid 'passing notes' that decorate a simpler underlying melodic structure.                                                                                                                                                                                         | "not present" (0); "present" (1)                                                     |
| Note Density                | Transcription     | Lullaby                 | The average number of notes per second in a given song                                                                                                                                                                                                                                                               | range: 0.44 - 6.82                                                                   |
| Note Duration               | Transcription     | Dance, Lullaby          | The average duration per note, in seconds.                                                                                                                                                                                                                                                                           | range: 0.17 - 2.04                                                                   |
| Intervallic distinctiveness | Transcription     | Lullaby, Healing        | Fraction of melodic intervals that belong to the second most common interval divided by the fraction of melodic intervals belonging to the most common interval; 0 if there are not two distinct most common melodic intervals.                                                                                      | range: 0 - 1                                                                         |
| Duple rhythm                | Expert Annotation | Dance, Lullaby          | The presence of duple subdivisions of the beat                                                                                                                                                                                                                                                                       | range: 0 - 1                                                                         |

**SI Table 4** Musical features selected by LASSO procedure. The features were derived from either *Transcription* or *Expert Annotation* datasets from Mehr et al. (2019). The "Selection" column denotes which of the three song types the feature was selected for. The "Scoring" column denotes the original scale of the feature score (note, however, that all features were z-scored in the analysis).

| Predictor        | Children |       |        |                | Adults (relative to Children) |       |        |              |
|------------------|----------|-------|--------|----------------|-------------------------------|-------|--------|--------------|
|                  | $\beta$  | SE    | t      | p              | $\beta$                       | SE    | t      | p            |
| Intercept        | 0.346    | 0.019 | 18.698 | < <b>0.001</b> | 0.076                         | 0.026 | 2.885  | <b>0.004</b> |
| Accentuation     | 0.137    | 0.021 | 6.372  | < <b>0.001</b> | 0.026                         | 0.030 | 0.871  | 0.385        |
| Tempo            | 0.138    | 0.022 | 6.308  | < <b>0.001</b> | 0.000                         | 0.031 | -0.002 | 0.998        |
| Metrical clarity | 0.145    | 0.020 | 7.272  | < <b>0.001</b> | -0.003                        | 0.028 | -0.096 | 0.924        |
| Duple rhythm     | 0.061    | 0.019 | 3.152  | <b>0.002</b>   | 0.008                         | 0.027 | 0.285  | 0.776        |
| Note duration    | 0.063    | 0.021 | 2.956  | <b>0.004</b>   | 0.006                         | 0.030 | 0.197  | 0.844        |

**SI Table 5** Musical features influencing children’s “dance” guesses, compared to those of adults. The LASSO-selected correlates for children are listed on the left side of the table; those of adults are on the right side and are tested relative to the children (i.e., from the interaction terms in the model). No musical features show a significant difference between children and adults, indicating that the two groups’ inferences are guided similarly by the musical features studied here.

| Predictor                    | Children |       |        |                | Adults (relative to Children) |       |        |              |
|------------------------------|----------|-------|--------|----------------|-------------------------------|-------|--------|--------------|
|                              | $\beta$  | SE    | t      | p              | $\beta$                       | SE    | t      | p            |
| Intercept                    | 0.274    | 0.017 | 15.798 | < <b>0.001</b> | -0.058                        | 0.025 | -2.368 | <b>0.019</b> |
| Accentuation                 | -0.131   | 0.022 | -5.928 | < <b>0.001</b> | 0.021                         | 0.031 | 0.673  | 0.502        |
| Melodic simplicity           | -0.091   | 0.022 | -4.164 | < <b>0.001</b> | 0.012                         | 0.031 | 0.393  | 0.695        |
| Tempo                        | -0.052   | 0.023 | -2.308 | <b>0.022</b>   | 0.004                         | 0.032 | 0.118  | 0.906        |
| Note duration                | -0.096   | 0.024 | -3.995 | < <b>0.001</b> | 0.020                         | 0.034 | 0.601  | 0.549        |
| Maj(-)/min(+) tonality       | 0.047    | 0.019 | 2.506  | <b>0.013</b>   | -0.005                        | 0.026 | -0.204 | 0.838        |
| Ornamentation                | -0.054   | 0.023 | -2.402 | <b>0.018</b>   | 0.002                         | 0.032 | 0.065  | 0.948        |
| Intervalllic distinctiveness | -0.047   | 0.020 | -2.356 | <b>0.020</b>   | -0.002                        | 0.028 | -0.056 | 0.955        |
| Note density                 | -0.068   | 0.027 | -2.514 | <b>0.013</b>   | 0.016                         | 0.038 | 0.404  | 0.687        |
| Metrical clarity             | -0.064   | 0.021 | -3.031 | <b>0.003</b>   | 0.012                         | 0.030 | 0.416  | 0.678        |
| Vibrato                      | -0.031   | 0.022 | -1.394 | 0.165          | 0.018                         | 0.031 | 0.593  | 0.554        |
| Duple rhythm                 | -0.043   | 0.019 | -2.303 | <b>0.023</b>   | 0.007                         | 0.026 | 0.279  | 0.781        |

**SI Table 6** Musical features influencing children’s “lullaby” guesses, compared to those of adults. The LASSO-selected correlates for children are listed on the left side of the table; those of adults are on the right side and are tested relative to the children (i.e., from the interaction terms in the model). No musical features show a significant difference between children and adults, indicating that the two groups’ inferences are guided similarly by the musical features studied here.

| Predictor              | Children |       |        |                | Adults (relative to Children) |       |        |       |
|------------------------|----------|-------|--------|----------------|-------------------------------|-------|--------|-------|
|                        | $\beta$  | SE    | t      | p              | $\beta$                       | SE    | t      | p     |
| Intercept              | 0.379    | 0.016 | 24.199 | < <b>0.001</b> | -0.017                        | 0.022 | -0.785 | 0.434 |
| Metrical clarity       | -0.070   | 0.018 | -3.978 | < <b>0.001</b> | -0.011                        | 0.025 | -0.454 | 0.651 |
| Tempo                  | -0.058   | 0.018 | -3.184 | <b>0.002</b>   | -0.016                        | 0.026 | -0.619 | 0.537 |
| Maj(-)/min(+) tonality | -0.056   | 0.016 | -3.494 | < <b>0.001</b> | 0.017                         | 0.023 | 0.731  | 0.466 |
| Syncopation            | -0.018   | 0.018 | -1.009 | 0.315          | -0.015                        | 0.025 | -0.604 | 0.547 |
| Vibrato                | 0.057    | 0.016 | 3.456  | < <b>0.001</b> | -0.031                        | 0.023 | -1.344 | 0.181 |
| Melodic simplicity     | 0.064    | 0.017 | 3.855  | < <b>0.001</b> | -0.021                        | 0.024 | -0.889 | 0.375 |

**SI Table 7** Musical features influencing children’s “healing” guesses, compared to those of adults. The LASSO-selected correlates for children are listed on the left side of the table; those of adults are on the right side and are tested relative to the children (i.e., from the interaction terms in the model). No musical features show a significant difference between children and adults, indicating that the two groups’ inferences are guided similarly by the musical features studied here.



| Predictor        | Children |       |        |                | Objective (relative to Children) |       |        |                |
|------------------|----------|-------|--------|----------------|----------------------------------|-------|--------|----------------|
|                  | $\beta$  | SE    | t      | p              | $\beta$                          | SE    | t      | p              |
| Intercept        | 0.422    | 0.014 | 31.166 | < <b>0.001</b> | -0.083                           | 0.019 | -4.312 | < <b>0.001</b> |
| Accentuation     | 0.163    | 0.016 | 10.405 | < <b>0.001</b> | -0.101                           | 0.022 | -4.535 | < <b>0.001</b> |
| Tempo            | 0.137    | 0.016 | 8.626  | < <b>0.001</b> | -0.054                           | 0.023 | -2.401 | <b>0.017</b>   |
| Metrical clarity | 0.142    | 0.015 | 9.765  | < <b>0.001</b> | -0.072                           | 0.021 | -3.469 | < <b>0.001</b> |
| Duple rhythm     | 0.068    | 0.014 | 4.865  | < <b>0.001</b> | -0.071                           | 0.020 | -3.598 | < <b>0.001</b> |
| Note duration    | 0.069    | 0.016 | 4.425  | < <b>0.001</b> | -0.069                           | 0.022 | -3.134 | <b>0.002</b>   |

**SI Table 8** Musical features influencing children’s “dance” guesses, compared to the features that objectively distinguish song types from one another. The LASSO-selected correlates for children are listed on the left side of the table; those that reliably correlate with song types across world regions are on the right side and are tested relative to the children (i.e., from the interaction terms in the model). Contrasting SI Tables 5-7, quite a few features differ significantly, indicating that in many cases, children’s intuitions (erroneously) deviate from the objective differences between song types.

| Predictor                   | Children |       |        |                | Objective (relative to Children) |       |        |                |
|-----------------------------|----------|-------|--------|----------------|----------------------------------|-------|--------|----------------|
|                             | $\beta$  | SE    | t      | p              | $\beta$                          | SE    | t      | p              |
| Intercept                   | 0.216    | 0.011 | 19.128 | < <b>0.001</b> | 0.125                            | 0.016 | 7.789  | < <b>0.001</b> |
| Accentuation                | -0.110   | 0.014 | -7.645 | < <b>0.001</b> | -0.016                           | 0.020 | -0.782 | 0.435          |
| Melodic simplicity          | -0.079   | 0.014 | -5.544 | < <b>0.001</b> | 0.078                            | 0.020 | 3.890  | < <b>0.001</b> |
| Tempo                       | -0.049   | 0.015 | -3.289 | <b>0.001</b>   | 0.015                            | 0.021 | 0.735  | 0.463          |
| Note duration               | -0.076   | 0.016 | -4.833 | < <b>0.001</b> | 0.078                            | 0.022 | 3.545  | < <b>0.001</b> |
| Maj(-)/min(+) tonality      | 0.041    | 0.012 | 3.407  | < <b>0.001</b> | -0.032                           | 0.017 | -1.852 | 0.066          |
| Melodic ornamentation       | -0.052   | 0.015 | -3.549 | < <b>0.001</b> | 0.050                            | 0.021 | 2.395  | <b>0.018</b>   |
| Intervallic distinctiveness | -0.048   | 0.013 | -3.742 | < <b>0.001</b> | 0.048                            | 0.018 | 2.655  | <b>0.009</b>   |
| Note density                | -0.053   | 0.018 | -2.985 | <b>0.003</b>   | 0.051                            | 0.025 | 2.048  | <b>0.042</b>   |
| Metrical clarity            | -0.051   | 0.014 | -3.754 | < <b>0.001</b> | 0.018                            | 0.019 | 0.925  | 0.356          |
| Vibrato                     | -0.012   | 0.014 | -0.853 | 0.395          | 0.014                            | 0.020 | 0.717  | 0.475          |
| Duple meter                 | -0.036   | 0.012 | -2.933 | <b>0.004</b>   | 0.040                            | 0.017 | 2.304  | <b>0.023</b>   |

**SI Table 9** Musical features influencing children’s “lullaby” guesses, compared to the features that objectively distinguish song types from one another. The LASSO-selected correlates for children are listed on the left side of the table; those that reliably correlate with song types across world regions are on the right side and are tested relative to the children (i.e., from the interaction terms in the model). Contrasting SI Tables 5-7, quite a few features differ significantly, indicating that in many cases, children’s intuitions (erroneously) deviate from the objective differences between song types.

| Predictor              | Children |       |        |                | Objective (relative to Children) |       |        |              |
|------------------------|----------|-------|--------|----------------|----------------------------------|-------|--------|--------------|
|                        | $\beta$  | SE    | t      | p              | $\beta$                          | SE    | t      | p            |
| Intercept              | 0.362    | 0.011 | 31.847 | < <b>0.001</b> | -0.042                           | 0.016 | -2.613 | <b>0.010</b> |
| Metrical clarity       | -0.082   | 0.013 | -6.372 | < <b>0.001</b> | 0.051                            | 0.018 | 2.840  | <b>0.005</b> |
| Tempo                  | -0.074   | 0.013 | -5.599 | < <b>0.001</b> | 0.042                            | 0.019 | 2.257  | <b>0.025</b> |
| Maj(-)/min(+) tonality | -0.040   | 0.012 | -3.395 | < <b>0.001</b> | 0.027                            | 0.017 | 1.627  | 0.106        |
| Sycopation             | -0.033   | 0.013 | -2.570 | <b>0.011</b>   | 0.058                            | 0.018 | 3.169  | <b>0.002</b> |
| Vibrato                | 0.026    | 0.012 | 2.146  | <b>0.033</b>   | -0.015                           | 0.017 | -0.881 | 0.380        |
| Melodic simplicity     | 0.043    | 0.012 | 3.583  | < <b>0.001</b> | -0.028                           | 0.017 | -1.655 | 0.100        |

**SI Table 10** Musical features influencing children’s “healing” guesses, compared to the features that objectively distinguish song types from one another. The LASSO-selected correlates for children are listed on the left side of the table; those that reliably correlate with song types across world regions are on the right side and are tested relative to the children (i.e., from the interaction terms in the model). Contrasting SI Tables 5-7, quite a few features differ significantly, indicating that in many cases, children’s intuitions (erroneously) deviate from the objective differences between song types.
